# Supplementary material for: Revised earthquake sources along Manila Trench for tsunami hazard assessment in the South China Sea
Source: Copernicus journal article supplement (doi:10.5194/nhess-2019-116), 2019-04-30
Supplement: Supplementary file 1 [file SupplementaryMaterial.pdf › SupplementaryFiles/SupplementaryMaterial.pdf]

*Supplementary file for*

**Revised earthquake sources along Manila Trench for tsunami hazard assessment  
in the South China Sea**

Qiang Qiu<sup>1,2</sup>, Linlin Li<sup>3,4</sup>, Ya-Ju Hsu<sup>5</sup>, Yu Wang<sup>6</sup>, Chung-Han Chan<sup>1</sup>, Adam D. Switzer<sup>1,2</sup>

<sup>1</sup>*Earth Observatory of Singapore, Nanyang Technological University, Singapore*

<sup>2</sup>*Asian School of the Environment, Nanyang Technological University, Singapore*

<sup>3</sup>*School of Earth Sciences and Engineering, Sun Yat-Sen University, Guangzhou, China*

<sup>4</sup>*Department of Civil and Environmental Engineering, National University of Singapore, Singapore*

<sup>5</sup>*Institute of Earth Sciences, Academia Sinica, Taipei, Taiwan*

<sup>6</sup>*Department of Geosciences, National Taiwan University, Taiwan*

**Table S1: Rupture scenarios and the associated initial surface displacements for tsunami simulations:**

| <b>Rupture zones</b> | <b>Coupling model A</b>                                                           | <b>Coupling model B</b>                                                           |
|----------------------|-----------------------------------------------------------------------------------|-----------------------------------------------------------------------------------|
| Zone 1               | CM A zone 1 (Figure 3.a). Initial surface displacements:<br>Vertical_dis_z1_A.txt | CM B zone 1 (Figure 3.d). Initial surface displacements:<br>Vertical_dis_z1_B.txt |
| Zone 2               | CM A zone 2 (Figure 3.b). Initial surface displacements:<br>Vertical_dis_z2_A.txt | CM B zone 2 (Figure 3.e). Initial surface displacements:<br>Vertical_dis_z2_B.txt |

| Zone 3                  | Rupture scenarios                                                                                                                                   | Rupture scenarios                                                                                                                                   | Rupture scenarios                                                                                                                               | Rupture scenarios                                                                                                                 | Rupture scenarios                                                                                                                                           |
|-------------------------|-----------------------------------------------------------------------------------------------------------------------------------------------------|-----------------------------------------------------------------------------------------------------------------------------------------------------|-------------------------------------------------------------------------------------------------------------------------------------------------|-----------------------------------------------------------------------------------------------------------------------------------|-------------------------------------------------------------------------------------------------------------------------------------------------------------|
| <b>Coupling model A</b> | CM A zone 3-Gaussian slip distribution with 50% coupling ratio (Figure 3c).<br><br>Initial surface displacements: Vertical_dis_z3_A_0.5Gaussian.txt | CM A zone 3-Gaussian slip distribution with 80% coupling ratio (Figure 8a).<br><br>Initial surface displacements: Vertical_dis_z3_A_0.8Gaussian.txt | Shallow slip: CM-A Zone 3 with 50% coupling ratio (Figure 5a and Figure 8c).<br><br>Initial surface displacements: Vertical_dis_z3_A_0.5TEQ.txt | Shallow slip: CM-A Zone 3 with 80% coupling ratio (Figure 6c).<br><br>Initial surface displacements: Vertical_dis_z3_A_0.8TEQ.txt | Mega+splay fault CM-A Zone 3 with 50% coupling ratio (Figure 5c and Figure 8e).<br><br>Initial surface displacements: Vertical_dis_z3_megasplay_cp_0.5A.txt |
| <b>Coupling model B</b> | CM B zone 3-Gaussian slip distribution with 50% coupling ratio (Figure 3f). Initial surface displacements: Vertical_dis_z3_B_0.5Gaussian.txt        | CM B zone 3-Gaussian slip distribution with 80% coupling ratio (Figure 8b).<br><br>Initial surface displacements: Vertical_dis_z3_B_0.8Gaussian.txt | Shallow slip: CM-B Zone 3 with 50% coupling ratio (Figure 5b and Figure 8d).<br><br>Initial surface displacements: Vertical_dis_z3_B_0.5TEQ.txt | Shallow slip: CM-B Zone 3 with 80% coupling ratio (Figure 6d). Initial surface displacements: Vertical_dis_z3_A_0.8TEQ.txt        | Mega+splay fault CM-B Zone 3 with 50% coupling ratio (Figure 5d and Figure 8f).<br><br>Initial surface displacements: Vertical_dis_z3_megasplay_cp_0.5B.txt |

| Zone 3                  | Rupture scenarios                                                                                                                             |
|-------------------------|-----------------------------------------------------------------------------------------------------------------------------------------------|
| <b>Coupling model A</b> | Mega+splay fault CM-A Zone 3 with 80% coupling ratio (Figure 6a).<br><br>Initial surface displacements: Vertical_dis_z3_megasplay_cp_0.8A.txt |
| <b>Coupling model B</b> | Mega+splay fault CM-B Zone 3 with 80% coupling ratio (Figure 6b).<br><br>Initial surface displacements: Vertical_dis_z3_megasplay_cp_0.8B.txt |
